1 **Title of the article**

2 LDL1 and LDL2 histone demethylases interact with FVE to regulate flowering in *Arabidopsis*

3 **Authors**

4 Mahima<sup>1,2</sup>, Sourav Chatterjee<sup>1</sup>, Sharmila Singh<sup>1</sup>, and Ananda K. Sarkar<sup>1,2\*</sup>

5 **Addresses**

6 <sup>1</sup>National Institute of Plant Genome Research,

7 Aruna Asaf Ali Marg,

8 New Delhi 110067.

9 <sup>2</sup>Jawaharlal Nehru University,

10 New Mehrauli Road, New Delhi 110067.

11

12 **\*Corresponding author**

13 Ananda K. Sarkar,

14 SLS, Jawaharlal Nehru University,

15 New Mehrauli Road, New Delhi 110067.

16

17 **Short title: LDL1 and LDL2 regulate flowering in *Arabidopsis***

18 **Keywords**

19 *Arabidopsis*/Flowering/chromatin modification/co-repressor complex

20

21

22

23

## 24 **Abstract**

25 In higher plants, epigenetic modifications provide a stage for both transient and permanent cellular  
26 reprogramming required for vegetative to reproductive phase transition. *Arabidopsis* LSD1-like 1  
27 (LDL1), a histone demethylase positively regulates floral transition, but the molecular and  
28 biochemical nature of LDL1 mediated flowering is poorly understood. Here we have shown that  
29 LDL1 mediated regulation of flowering is dependent on MADS AFFECTING FLOWERING 4  
30 (MAF4) and MAF5 floral repressors. LDL1 binds on the chromatin of *MAF4* and *MAF5* and  
31 removes H3K4me2 activation marks to repress their expression. Further we show that LDL2  
32 negatively regulates the expression of *MAF4* and *MAF5* redundantly with LDL1. Both LDL1 and  
33 LDL2 interact with an autonomous flowering pathway protein, FLOWERING LOCUS VE (FVE),  
34 to regulate the floral transition and thus could be a part of the FVE-corepressor complex. We show  
35 that MAF5 interacts with other floral repressors FLC and SHORT VEGETATIVE PHASE (SVP)  
36 and repress the expression of *FT* to delay floral transition. Thus, our results deepen the mechanistic  
37 understanding of LDL1/LDL2-FVE mediated floral transition in *Arabidopsis*.

## 38 **Introduction**

39 In plants, the precise timing of the transition from the vegetative to reproductive phase is crucial  
40 for deciding reproductive success<sup>1</sup>. *Arabidopsis* has six major genetic pathways which coalesce  
41 various internal and external signals to access the appropriate time of flowering. These pathways  
42 include autonomous, photoperiod, vernalization, gibberellin (GA), temperature, and age-  
43 dependent pathways<sup>2-4</sup>. All these pathways either converge to suppress the expression of MADS-  
44 box transcription factor, *FLOWERING LOCUS C (FLC)*, or directly upregulate the floral  
45 integrator genes, *FLOWERING LOCUS T (FT)* and *SUPPRESSOR OF OVEREXPRESSION OF*  
46 *CONSTANS1 (SOC1)*, which are negatively regulated by FLC<sup>5-7</sup>. FLC associates with another  
47 MADS-box protein, SHORT VEGETATIVE PHASE (SVP), and together they repress *FT* in  
48 companion cells of leaf vein and *SOC1* in shoot meristem<sup>7-9</sup>. Lately, the role of FLC clade  
49 members, MADS AFFECTING FLOWERING1 to 5 (MAF1-to 5) has been implicated in  
50 preventing precocious flowering. MAF1 was the first FLC homolog to be analyzed, and it seems  
51 to act through both photoperiod and thermosensory pathways in parts, independently of FLC<sup>10-12</sup>.  
52 *MAF2* to 4 are also reported to delay flowering redundantly with FLC<sup>13-15</sup>. MADS-box proteins  
53 are known to form multimeric protein complexes in different combinations<sup>16,17</sup>. FLC, SVP, FLM,

54 and MAF3 are reported to be highly enriched in intronic regions of *FT* chromatin, and MAF2 and  
55 MAF4 are predicted to bind *FT* chromatin as well<sup>8,9,15</sup>. Therefore, it is possible that SVP forms  
56 dimeric/tetrameric MADS domain repressor complexes with different combinations of FLC clade  
57 proteins to regulate flowering. All these MADS-box proteins bind to CArG motifs enriched in the  
58 intronic and 5' promoter region of the *FT* locus, possibly with different affinities and/or tissue  
59 preferences to repress *FT* expression in a partially overlapping manner<sup>7,15,18,19</sup>.

60 Epigenetic modifications play a crucial role in negatively regulating *FLC* and its clade members  
61 during vernalization and in the autonomous flowering pathway. In winter annual ecotypes of  
62 *Arabidopsis*, vernalization, a prolonged cold exposure, is a prerequisite to initiating flowering.  
63 Vernalization replaces activating H3K4me3 and H3K36me3 modifications with repressive  
64 H3K27me3 modification via the activity of various chromatin modifiers<sup>20</sup>. Similarly, in the  
65 autonomous flowering pathway, various epigenetic modifiers act together to repress the expression  
66 of *FLC*<sup>21</sup>. One of the corepressor complexes of the autonomous flowering pathway includes  
67 FLOWERING LOCUS D (FLD), FLOWERING LOCUS VE (FVE), HISTONE  
68 DEACETYLASE 5 (HDA5), and HDA6. This complex removes activating H3K4 methylation and  
69 H3 or H4 acetylation marks from *FLC*, *MAF4*, and *MAF5* loci<sup>22-26</sup>. FLD belongs to the LSD1-like  
70 (LDL) family of histone demethylases in *Arabidopsis*, which includes LDL1, LDL2, and LDL3.  
71 These proteins are homologs of human LYSINE SPECIFIC DEMETHYLASE 1 (LSD1)<sup>27</sup>. LSD1  
72 contains an N-terminal Swi3p/Rsc8p/Moira (SWIRM) domain involved in protein-protein  
73 interaction and a C-terminal amine-oxidase like (AOL) domain<sup>28,29</sup>. The AOL domain further  
74 contains two subdomains, a FAD-binding, and a substrate-binding domain<sup>30,31</sup>. Like LSD1,  
75 *Arabidopsis* LDL family members also comprise an N-terminal SWIRM domain and a C-terminal  
76 amine oxidase domain<sup>27</sup>. LDL1 and LDL2 suppress various seed dormancy-related genes, like  
77 *DELAY OF GERMINATION 1 (DOG1)*, and genes related to Abscisic acid biosynthesis and  
78 signaling<sup>32</sup>. A recent report has elucidated the role of LDL1 and LDL2 in regulating circadian  
79 rhythm, where they negatively regulate the expression of the evening expressed *TIMING OF CAB*  
80 *EXPRESSION 1 (TOC1)*<sup>33</sup>. Additionally, LDL1 also inhibits root growth and branching by  
81 negatively regulating the expression of *LATERAL ROOT PRIMORDIUM1 (LRP1)* in the primary  
82 root and is proposed to suppress root branching by modulating the expression of *AUXIN*  
83 *RESPONSE FACTORS (ARFs)*<sup>34,35</sup>.

84 The two mutant alleles of *LDL1*, *ldl1-1* and *ldl1-2* show late flowering phenotype<sup>27, 36</sup>. This late  
85 flowering phenotype indicates the potential role of *LDL1* in the regulation of flowering time,  
86 which is underexplored. In the present study we have shown the mechanism behind *LDL1*  
87 mediated flowering time regulation by identifying its novel downstream targets and biochemical  
88 activity. We have shown that *LDL1* and *LDL2* targets the same set of MADS-box floral repressors  
89 to allow flowering and interact with *FVE*, a crucial component of the autonomous flowering  
90 pathway. *MAF5* a common target of *LDL1* and *LDL2* was found to interact with other floral  
91 repressors, *FLC* and *SVP*, and subsequently repress the expression of *FT*. Collectively, these  
92 findings enhance our understanding on the role of chromatin modifiers in the regulation of  
93 flowering time.

## 94 **Results**

### 95 ***LDL1* negatively regulates the expression of *MAF4* and *MAF5***

96 *LDL1* belongs to the *LDL* family of histone demethylases in *Arabidopsis*. *LDL1*, along with its  
97 family members, *LDL2* and *FLD* allow vegetative to floral transition by negatively regulating the  
98 expression of *FLC*<sup>27, 36</sup>. To understand the genetic interaction between *LDL1* and *FLC*, we  
99 generated a *ldl1flc* double mutant. We observed that *ldl1flc* plants flowered earlier than *ldl1* but  
100 later than *flc* plants, suggesting that there might be other targets of *LDL1* other than *FLC*  
101 (Supplementary Figure 1). *FLD*, a family member of *LDL1* regulates the expression of two other  
102 members of MADS-box family genes, *MAF4* and *MAF5*<sup>24</sup>. This prompted us to check the  
103 expression of *MAF4* and *MAF5* in *ldl1* mutant plants and we found that the expression of *FLC*,  
104 *MAF4*, and *MAF5* transcripts was upregulated in *ldl1* with respect to the wild type (WT) (Figure  
105 1A)

106 To understand the role of *LDL1* more elaborately in relation to the regulation of *MAF4* and *MAF5*  
107 expression, we generated the overexpression construct of *LDL1* under constitutive *RPS5A*  
108 promoter (*proRPS5A:LDL1*)<sup>37</sup>. Several T1 plants showed upregulation of *LDL1* transcripts, and  
109 we selected two independent T1 plants which showed the highest upregulation, *LDL1 OE#1* and  
110 *LDL1 OE#4* (Supplementary Figure 2). We selected homozygous T3 plants and checked the  
111 expression of *FLC*, *MAF4*, and *MAF5* transcripts in *LDL1 OE#1* and *LDL1 OE#4* plants. Both  
112 *FLC* and *MAF4* were downregulated in the *LDL1 OE* plants, whereas transcript levels of *MAF5*  
113 were comparable to the WT plants (Figure 1B).

114 To confirm that LDL1 regulated floral transition is dependent on MAF4 and MAF5, we proceeded  
115 to check whether *maf4* and *maf5* single mutants have altered flowering time. As previously  
116 reported, *maf4* and *maf5* show early floral transition in the *Landsberg erecta* (*ler*) ecotype, but  
117 their role as floral repressors in *Columbia* (Col-0) ecotype remained uncertain<sup>13</sup>. We measured the  
118 days to bolting in *maf4* and *maf5* single mutants and found that both *maf4* and *maf5* plants showed  
119 early flowering phenotype as compared to the WT plants (Figure 1C). Rosette leaf numbers were  
120 also in accordance with the time taken to flower (Figure 1D and 1E). This result indicates that both  
121 MAF4 and MAF5 are involved in negatively affecting flowering time. Taken together, our results  
122 specify that LDL1 induces floral transition through repressing *FLC*, *MAF4*, and *MAF5*.

### 123 **LDL1 binds to the chromatin of MAF4 and MAF5 to regulate their expression**

124 LSD1, the human homolog of LDL1 regulates its targets by binding to their chromatin and carrying  
125 out histone demethylation<sup>38</sup>. To check whether LDL1 binds to the chromatin of *MAF4* and *MAF5*  
126 directly to regulate their expression, we generated a translational fusion construct of LDL1 with  
127  $\beta$ -glucuronidase (GUS) under its native promoter (*proLDL1:LDL1-GUS*). To confirm that the  
128 *proLDL1:LDL1-GUS* construct is functional, we transformed the construct into *ldl1* mutant  
129 background. The level of *LDL1* mRNA was restored and the late-flowering phenotype of *ldl1*  
130 mutant plants was rescued in *proLDL1:LDL1-GUS* (*ldl1*) plants (Supplementary Figure 3).  
131 Through Histochemical GUS assay, LDL1 was found to be expressed in shoot apical meristem,  
132 leaves, flowers, hypocotyl, primary root, and different stages of lateral root (LR) development,  
133 indicating its potential role in various aspects of plant development (Supplementary Figure 4).

134 Using *proLDL1:LDL1-GUS* (*ldl1*) plants, we checked the binding of LDL1 on the chromatin of  
135 *MAF4* and *MAF5* through ChIP-quantitative Real-Time (ChIP-qRT) PCR. We found the  
136 enrichment of LDL1 on the promoter and exon1 of *MAF4* and *MAF5* (Figure 2A and 2B). Next,  
137 we generated the reporter constructs of *MAF4* and *MAF5* to see how their expression patterns  
138 differ in *ldl1* mutant plants from the WT plants. We transformed the *proMAF4:GFP-GUS* and  
139 *proMAF5:GFP-GUS* constructs into the *ldl1* mutant and WT plants (Figure 2C). We selected the  
140 T1 plants which showed the GUS staining in both *ldl1* and WT backgrounds for performing further  
141 experiments. In the T2 generation, the GUS activity of *proMAF4:GFP-GUS* was observed in the  
142 hypocotyl and leaves of 7-dag seedlings in the *ldl1* background but was absent in the WT  
143 background (Figure 2D and 2E). Similarly, for *proMAF5:GFP-GUS*, we found the GUS activity

144 in the shoot of 9dag seedlings of *ldl1* background, which was absent in the WT background (Figure  
145 2F and 2G). T2 lines obtained from four independent T1 lines of each construct in both WT and  
146 *ldl1* backgrounds were checked for GUS staining, and the results were consistent. Collectively,  
147 our data suggest that LDL1 binds to the chromatin of *MAF4* and *MAF5* and negatively regulates  
148 their expression *in planta*.

#### 149 **Mutations in *MAF4* and *MAF5* loci rescue the late-flowering phenotype of *ldl1***

150 To understand the interaction between LDL1 and *MAF4* and *MAF5* at a genetic level, we crossed  
151 *ldl1* with *maf4* and *maf5* single mutants and selected *ldl1maf4* and *ldl1maf5* double mutant plants.  
152 We found that both *ldl1maf4* and *ldl1maf5* plants flowered earlier than the *ldl1* single mutant plan  
153 and their flowering time was comparable to that of the WT plants (Figure 3A and 3D). Rosette  
154 leaves quantification of *ldl1*, *ldl1maf4*, *ldl1maf5*, and WT plants at the time of bolting was  
155 consistent with their flowering phenotype, that is, the number of rosettes leaves of *ldl1maf4* and  
156 *ldl1maf5* during bolting was comparable to that of the WT plants, whereas *ldl1* single mutant plants  
157 had more rosette leaves in accordance with its late-flowering phenotype (Figure 3B, 3C, 3E, and  
158 3F). Therefore, our results indicate LDL1 mediated flowering time regulation is dependent on  
159 *MAF4* and *MAF5* functions.

#### 160 **LDL1 shows H3K4me2 and H3K9me2 demethylase activity in vitro**

161 The human homolog of LDL1, LSD1 majorly acts as a transcriptional repressor by removing  
162 activating histone marks, H3K4me1 and H3K4me2 by flavin adenosine dinucleotide (FAD)  
163 dependent oxidation reaction, but an interaction of LSD1 with androgen receptor results in H3K9  
164 demethylation leading to gene activation<sup>39, 40</sup>. In comparison to its human counterpart,  
165 biochemical nature of LDL1 is poorly understood<sup>27, 36</sup>. Therefore, to check the biochemical  
166 activity of LDL1 and understand how it represses *MAF4* and *MAF5*, we purified GST tagged LDL1  
167 and checked its demethylation activity on histones (Figure 4A). We found that like LSD1,  
168 *Arabidopsis* LDL1 too has *in-vitro* H3K4me2 demethylase activity (Figure 4B and 4C). In  
169 addition, LDL1 was able to demethylate H3K9me2 marks *in-vitro* (Figure 4B and 4D), which is  
170 not the case for LSD1 as it is unable to demethylate H3K9 marks *invitro* and requires the specific  
171 interacting partners to carry out H3K9 demethylation<sup>40, 41</sup>. Taken together with previous results,  
172 we can deduce that LDL1 binds to the chromatin of *MAF4* and *MAF5* and repress them by  
173 removing activating H3K4me2 marks.



## 174 **LDL2 along with LDL1 negatively regulates the expression of MAF4 and MAF5**

175 Since LDL family members FLD and LDL1 regulate flowering, we were interested to know if  
176 LDL2 also affects flowering. To understand this, we scored the time taken for bolting by *ldl2*  
177 plants. Like *ldl1* plants, *ldl2* plants have a late-flowering phenotype compared to WT, but it is not  
178 as strong as that of *ldl1* plants (Figure 5A and 5B). The *ldl1ldl2* plants have a stronger late-  
179 flowering phenotype than either of the single mutants (Figure 5A and 5B). LDL2 is also known to  
180 negatively regulate the expression of *FLC* and *FWA* along with LDL1<sup>27</sup>. Given the flowering  
181 phenotype of *ldl2* and previous data, we were interested to find whether LDL2 regulates the  
182 expression of *MAF4* and *MAF5*. The expression of both *MAF4* and *MAF5* was upregulated in  
183 *ldl1* and *ldl2* plants in comparison to WT plants. The expression of *MAF4* and *MAF5* in *ldl1ldl2*  
184 plants was even higher than either of the single mutant plants which agrees with their flowering  
185 phenotype (Figure 5A to 5D). Taken together, our phenotypic and expression analysis suggest that  
186 LDL1 and LDL2 regulate flowering synergistically.

## 187 **LDL1 and LDL2 interact with FVE to regulate flowering time in *Arabidopsis***

188<sup>24,25</sup>. A recent report showed that LDL1 and LDL2 interact with HDA6 to regulate the circadian  
189 clock of *Arabidopsis*<sup>33</sup>. HDA6 is a crucial part of the autonomous flowering pathway and is  
190 reported to act in a multiprotein complex that includes HDA5, FVE, and FLD as well. This  
191 multiprotein complex is established to induce flowering and the repression of *FLC*, *MAF4*, and  
192 *MAF5* expression<sup>24,25</sup>. Therefore, we checked the expression of *MAF4* and *MAF5* in *ldl1ldl2hda6*  
193 triple mutant plants and their transcript levels were even more elevated than in *ldl1ldl2* double  
194 mutant plants. This indicates that LDL1 and LDL2 might be a part of a much bigger co-repressor  
195 complex that represses various MADS-box transcription factors to induce flowering. To further  
196 confirm this hypothesis, we checked the one-to-one interaction of LDL1 and LDL2 with each other  
197 and different known members of the co-repressor complex, FLD, HDA5, and FVE using yeast-2  
198 hybrid (Y2H) assay (Figure 6A and Supplementary Figure5). We found that both LDL1 and LDL2  
199 interact with FVE in the Y2H assay indicating the specificity of the interaction. To validate the  
200 interaction of LDL1 and LDL2 with FVE at a genetic level, we generated *fve<sup>C</sup>* single mutant and  
201 *ldl1fve<sup>C</sup>* and *ldl2fve<sup>C</sup>* double mutant plants utilizing CRISPR-mediated genome editing. We  
202 selected the *fve<sup>C</sup>*, *ldl1fve<sup>C</sup>*, and *ldl2fve<sup>C</sup>* T1 plants with a similar deletion in exon 1 of *FVE* for  
203 analyzing alteration in their flowering time (Supplementary Figure6). We found the *fve<sup>C</sup>* single

204 mutant plants showed late-flowering phenotype as compared to the WT plants (Figure 6C).  
205 *ldl2fve<sup>C</sup>* double mutant plants flowered later than *fve<sup>C</sup>* single mutant plants and *ldl1fve<sup>C</sup>* double  
206 mutant plants showed delayed flowering even compared to *ldl2fve<sup>C</sup>* plants (Figure 6D). Therefore,  
207 our results suggest that LDL1 and LDL2 are potential members of the corepressor complex  
208 through FVE and HDA6, and FVE promotes bolting co-dependently with LDL1 and LDL2.

### 209 **MAF5 interacts with FLC and SVP to regulate the expression of FT**

210 MADS-box genes are known to form multimeric protein complexes<sup>16</sup>. FLC is known to interact  
211 with another MADS-box gene SVP to negatively regulate the expression of floral activators *FT*  
212 and *SOCI*<sup>7-9, 19</sup>. Lately, MAF4 has been shown to interact with FLC and SVP and regulate the  
213 expression of *FT*<sup>15</sup>. In contrast, not much is known about MAF5 in terms of its interacting partners  
214 and direct downstream targets. Using the Y2H assay we found that MAF5 interacts with FLC and  
215 SVP and forms dimer with itself (Figure 7A). Since MAF5 is the clade member of FLC and  
216 interacts with both FLC and SVP, it is possible that MAF5 also binds to the chromatin of *FT* to  
217 repress the expression of *FT* and hence flowering. We quantified the promoter activity of  
218 *proFT:LUC* in *N.benthamiana* leaves using FLC, SVP, and MAF5 in different combinations. .  
219 FLC and SVP co-infiltrated together repressed *FT* promoter activity in contrast to FLC alone  
220 (Figure 7B). We also found that promoter activity of *FT* was reduced in the presence of MAF5 in  
221 combination with FLC and SVP as compared to FLC and SVP alone (Figure 7C and 7D). Our  
222 results suggest that the interaction of MAF5 with FLC and SVP represses *FT* in an additive manner  
223 to repress flowering.

### 224 **Discussion**

225 The seed of this study was planted by a genetic study, where we found that *ldl1flc* flowered  
226 significantly earlier than *ldl1* single mutant but later than the *flc* single mutant (Supplementary  
227 figure 1). This observation implied the presence of additional targets of LDL1, which could  
228 contribute to its role in the regulation of flowering time. FLD, a family member of LDL1 is a well-  
229 known part of a corepressor complex, which functions in the autonomous flowering pathway and  
230 represses *FLC* and its clade members *MAF4* and *MAF5* to induce flowering<sup>24</sup>. Expression of *FLC*,  
231 *MAF4*, and *MAF5* was upregulated in *ldl1* mutant and the expression of *FLC* and *MAF4* was  
232 downregulated in *LDL1 OE* plants indicating that LDL1 negatively regulates the expression of  
233 *FLC*, *MAF4*, and *MAF5* (Figure 1 A and 1B). We didn't find any significant reduction in *MAF5*



234 transcripts in *LDL1 OE* plants than in the WT plants (Figure 1B). The possible reason could be  
235 that *MAF5* is already highly repressed in the WT at 12 dag to induce the expression of floral  
236 integrator genes. There are several inconsistencies regarding the role of *MAF4* and *MAF5* as floral  
237 repressors. A primary study done by Ratcliffe et al. suggested that generating *MAF4* and *MAF5*  
238 overexpression in the Col-0 background either had no visible phenotype or flowered earlier than  
239 the Col-0 plants. However, generating their overexpression in the *ler* background significantly  
240 delayed the flowering time<sup>13</sup>. Later it was found that T-DNA insertion mutant *maf4* in Col-0  
241 background shows early flowering under short days<sup>14</sup>. In contrast to its clade members, *FLC*,  
242 *MAF1-MAF3* which are downregulated when subjected to vernalization, *MAF4* and *MAF5* show  
243 somewhat dynamic expression patterns<sup>42</sup>. To understand their role as floral repressors, we  
244 observed the flowering phenotype of *maf4* and *maf5* mutants in the Col-0 background under long-  
245 day conditions, and both *maf4* and *maf5* showed early flowering phenotype as compared to the  
246 WT plants proving their role as a potent floral repressor (Figure 1C to 1E). In winter annual  
247 ecotypes of *Arabidopsis*, the presence of a dominant allele of *FRIGIDA (FRI)* contributes to higher  
248 levels of *FLC* so that the plants can surpass the winters and flower in spring<sup>5,6</sup>. A recent study  
249 also showed that expressing *FRIGIDA* under root-specific promoter in *Arabidopsis* leads to the  
250 upregulation of *MAF4* and *MAF5* in the root, which might result in the formation of some mobile  
251 signal, which travels from root to shoot to antagonize the expression of *FT*, and hence delays  
252 flowering<sup>43</sup>. This study also reinforces the role of *MAF4* and *MAF5* as floral repressors.

253 *LDL1* is a histone modifier, and histone modifiers regulate the expression of their direct targets by  
254 binding to their chromatin and changing chromatin marks. Using *proLDL1:LDL1-GUS* plants,  
255 *LDL1* was found to be enriched on the promoter and exon1 of *MAF4* and *MAF5* (Figure 2A and  
256 2B). Genome-wide ChIP-seq analysis of *LDL1* also revealed that 30 to 35% of *LDL1* binding sites  
257 are present on the promoters and 30% to 40% are present in the first exon of protein-coding genes,  
258 which also aligns with our result<sup>44</sup>. The presence of GUS activity of *proMAF4:GFP-GUS* and  
259 *proMAF5:GFP-GUS* in *ldl1* mutant plants (Figure 2D to 2G) and the rescued late-flowering  
260 phenotype of *ldl1* plants by the mutation in *MAF4* and *MAF5* loci (Figure 3 further confirm the  
261 repression of *MAF4* and *MAF5* by *LDL1*. *LDL1* was found to have invitro H3K4me2 demethylase  
262 activity (Figure 4B and 4C) and thus it demethylates H3K4me2 marks to repress its targets. In  
263 addition to H3K4me2 demethylase activity, *LDL1* also possesses H3K9me2 demethylase activity

264 (Figure 4B and 4D). During *in vitro* enzymatic assays Human LSD1 was found only to demethylate  
265 only H3K4me1/me2 marks, but the interaction of LSD1 with certain partners resulted in  
266 demethylation of H3K9 *in vivo*<sup>39-41</sup>. Interestingly we found that, unlike LSD1, LDL1 can  
267 demethylate H3K9me2 marks independent of any interacting partners, indicating that LDL1 could  
268 also contribute to transcriptional activation. Interestingly a study came out showing LDL1  
269 positively regulates the expression of *ANGUSTIFOLIA3 (AN3)* and H3K9 methylation marks were  
270 found to be reduced on *AN3* loci in the *LDL1 OE* plants<sup>45</sup>. Hence, LDL1 can remove both  
271 transcriptionally permissive and repressive marks in *Arabidopsis*, but the role of LDL1 as a  
272 transcriptional activator needs further exploration.

273 Apart from LDL1, LDL2 also represses the expression of *MAF4* and *MAF5*, and they do so in a  
274 concerted manner (Figure5). When this manuscript was under preparation, both LDL1 and LDL2  
275 were shown to interact with HDA6 to regulate circadian rhythm<sup>46</sup>. The transcript level of both  
276 *MAF4* and *MAF5* was more upregulated in *ldl1ldl2hda6* than *ldl1ldl2*, which was comparable to  
277 their flowering phenotype (Figure 5). Since HDA6 is also a part of the autonomous flowering  
278 pathway, its interaction with LDL1 and LDL2 and cumulative effect on the expression of *MAF4*  
279 and *MAF5* and hence on floral transition proposes LDL1 and LDL2 as potential members of the  
280 autonomous flowering pathway. This hypothesis was confirmed by the direct one to one  
281 interaction of LDL1 and LDL2 with a crucial component of autonomous pathway, FVE (Figure  
282 6A). *FVE* was identified as one of the first loci of the autonomous flowering pathway through  
283 genetic screening<sup>47</sup>. It is a homolog of mammalian RETINOBLASTOMA-ASSOCIATED  
284 PROTEINS RBAP46 AND RBAP48 (RbR) and yeast MULTICOPY SUPPRESSOR OF  
285 IRA1(MSI), which are involved in chromatin modifications<sup>48</sup>. These proteins contain several  
286 repeats of the WD40 motif, which allows protein-protein interaction. These proteins have no  
287 enzymatic activity but are involved in stabilizing various chromatin-modifying complexes  
288 (Summarised in supplementary table 1) The interaction of LDL1 with FVE was then confirmed in  
289 planta, by generating *fve<sup>c</sup>*, *ldl1fve<sup>c</sup>*, and *ldl2fve<sup>c</sup>* plants. We observed that *fve<sup>c</sup>* single mutant plants  
290 showed a late flowering phenotype (Figure 6C) as observed by Koornneef et al<sup>47</sup>. *ldl2fve<sup>c</sup>* double  
291 mutant plants flowered later than *fve<sup>c</sup>* and the flowering in *ldl1fve<sup>c</sup>* plants was even more delayed  
292 than *ldl2fve<sup>c</sup>* plants, consistent with the flowering phenotype of *ldl1* and *ldl2* plants (Figure 6D  
293 and5A). In *Arabidopsis*, FVE interacts with HDA5, HDA6, and FLD to repress the expression of

294 *FLC*, *MAF4*, and *MAF5* to induce flowering<sup>24, 25</sup>. This suggests that LDL1 and LDL2 could be a  
295 part of the autonomous flowering pathway through their interaction with FVE and HDA6.  
296 Unlike *FLC* and its clade members, *MAF1-MAF3* which are downregulated during vernalization,  
297 expression of *MAF4* and *MAF5* show a dynamic pattern during vernalization, where their  
298 expression first increases during vernalization and then decreases<sup>49</sup>. Another study reported that  
299 *NAT-lncRNA\_2962* (*MAS*), antisense long non-coding RNA (lncRNA) produced by the *MAF4*  
300 locus is induced by cold treatment and positively regulates the expression of *MAF4*<sup>50</sup>. Therefore,  
301 it is possible that the expression of *MAF4* and *MAF5* is positively regulated by their respective  
302 lncRNAs under vernalization to avoid precocious flowering. Contrastingly, the lncRNAs produced  
303 by *FLC* under cold treatment, COOLAIR, COLDAIR, and COLDWRAP repress the expression of  
304 *FLC*<sup>51-53</sup>. These opposite expression patterns of *FLC* and *MAF4* under vernalization are the  
305 outcome of differential regulation by their respective lncRNAs and thus highlights the importance  
306 of lncRNAs in regulating flowering time. Recently, a report from Hung et al. showed increased  
307 levels of lncRNAs produced by *MAF4* and *MAF5* loci independent of cold exposure in  
308 *ldl1ldl2hda6* plants<sup>44</sup>. Combined, these observations direct to the possibility that the co-repressor  
309 complex involving LDL1 and LDL2, apart from regulating levels of *MAF4* and *MAF5* by  
310 changing their chromatin status directly, also regulates them indirectly through their corresponding  
311 lncRNAs.

312 *MAF5* controls floral transition by interacting with *FLC* and *SVP* to negatively regulate the  
313 expression of *FT* (Figure 7). Recent advances have shown that *SVP* interacts with *FLC*, *MAF2*,  
314 and *MAF4* to repress floral transition<sup>15, 19</sup>. Our results indicate that *MAF5* could also be a part of  
315 *SVP-FLC-MAFs* tetrameric complexes. Several other MADS-box transcription factors,  
316 *AGAMOUS* (*AG*), *SEPLATTA3* (*SEP3*), *APETALLA1* (*AP1*), *AP3*, and *FRUITFUL* (*FUL*) act  
317 in tetrameric complexes to allow floral organ initiation<sup>54</sup>. Therefore, it is possible that several  
318 MADS-box complexes coexist in the nucleus of a cell and compete for CArG motifs on their  
319 downstream genes and the abundance of the specific complex at a given time or their tissue specific  
320 expression would decide the fate of floral transition and floral organ development.

321 To summarise our work, we found that LDL1 promotes floral transition in *Arabidopsis* by  
322 suppressing the expression of floral repressors *MAF4* and *MAF5*. LDL1 has H3K4me2  
323 demethylation activity and binds to *MAF4* and *MAF5* chromatin to alter their chromatin status.  
324 LDL2 also represses *MAF4* and *MAF5* expression, and both histone demethylases interact with

325 FVE, and thus potentially act as parts of a bigger corepressor complex involved in the autonomous  
326 flowering pathway. MAF5 interacts with two other MADS-Box floral repressors, FLC and SVP  
327 and together they bind to the promoter of FT to inhibit its expression to hinder precocious  
328 flowering (Figure 8).

## 329 **Materials and Methods**

### 330 **Plant material and growth conditions**

331 *Arabidopsis thaliana* Wild type Columbia-0 (WT), *ldl1-1* (SALK\_142477), *ldl1-2*  
332 (SALK\_034869C), *flc-3*, *maf4* (SAIL\_1213\_A08), *maf5* (SALK\_015513), *ldl2*  
333 (SALK\_135831C), *ldl1flc*, *ldl1maf4*, *ldl1maf5*, *ldl1ldl2* and *ldl1ldl2hda6* were used in the study.

334 *Arabidopsis thaliana* seeds were surface sterilized with 70 % ethanol containing 0.1 % (v/v) Triton  
335 X-100 in a microcentrifuge tube for 10 min followed by 5-6 times washes with sterile water.  
336 Surface sterilized seeds were kept at 4°C (in dark) for 3 days to synchronize germination. Seeds  
337 were then transferred on 0.5X Murashige and Skoog medium<sup>55</sup> plates containing 0.8 % (v/v) plant  
338 agar. Plates were kept in a near-vertical position in the plant growth chamber having 21°C  
339 temperature and light illumination (around 120  $\mu\text{M}^{-2}$ ) period for 16 hrs followed by an 8hrs dark  
340 period.

341 For analyzing flowering phenotype plants were either grown on 0.5X Murashige and Skoog  
342 medium for 6 days and then transferred to pots or seeds were directly sprinkled in the pots,  
343 stratified for 3 days, and then transferred to the closed growth chamber. Rosette leaves were scored  
344 at the appearance of inflorescence. All the phenotypic experiments were repeated thrice.

### 345 **Transgenics generation**

346 *LDL1 OE* plants were generated by amplifying 2535 bp of the coding sequence in modified  
347 pCAMBIA1301 vector under *pRPS5A* promoter. The construct was transformed into WT plants  
348 through the *Agrobacterium tumefaciens* (GV3850) mediated floral dip method<sup>56</sup>. For constructing  
349 *proLDL1:LDL1-GUS* plants, we amplified 3357 bp of gDNA and cloned it in pCAMBIA1301.  
350 The construct and the empty vector control were transformed in *ldl1* plants. For generating the  
351 *proMAF4:GFP-GUS* construct, 1242bp upstream and 187 bp downstream of translation start site  
352 was taken in frame with GFP and for *proMAF5: GFP-GUS* construct, 1977bp upstream and 62 bp  
353 downstream of translation start site were taken in frame with GFP (pCAMBIA1304). Both  
354 *proMAF4:GFP-GUS* and *proMAF5: GFP-GUS* were transformed into WT and *ldl1* mutant

355 backgrounds. For generating *five* mutant plants using genome editing, we employed the system,  
356 which allowed the assembly of two guide RNAs (gRNAs) to maximize the probability of  
357 generating the mutant. We used <http://www.rgenome.net/cas-offinder/> to evaluate target  
358 specificities to rule out the possibility of potential off-target and selected the gRNA with no or  
359 minimum off-targets. Both selected gRNAs targeted exon 1 of *FVE*. Using the golden gate  
360 assembly method, we cloned the two gRNAs in the binary vector and confirmed the clones using  
361 colony PCR and sequencing (Figure 6.7). The confirmed clone was transformed into WT, *ldl1*,  
362 and *ldl2* plants.

363 Positive plants were selected by growing the T1 seeds on Hygromycin B selection media.  
364 Resistant plants were grown and used for expression level analysis and histochemical GUS assay.  
365 Genetic segregation analysis was performed to confirm single T-DNA insertion and homozygous  
366 T3 seeds were used for further experiments.

### 367 **Histochemical GUS assay**

368 To study the spatiotemporal expression of the various genes, we have performed GUS  
369 histochemical analysis as described previously<sup>57</sup>. The *Arabidopsis* whole seedlings or other  
370 tissues were transferred in the microcentrifuge tubes containing an appropriate amount of GUS  
371 staining buffer [50 mM sodium phosphate (pH 7), 50 mM EDTA (pH 8), 0.5 mM K<sub>3</sub>Fe(CN)<sub>6</sub>,  
372 0.1 % Triton X-100, 1 mM X-Gluc] and kept at 37°C and checked at regular intervals for the  
373 development of blue-colored end product as GUS enzyme cleaves the substrate, X-Gluc. Once  
374 an adequate signal had developed in the different tissues under study, the GUS staining buffer  
375 was replaced with a solution of acetone: ethanol (1:3 ratio) to remove chlorophyll from the green  
376 tissues. Desired tissues were placed on slides having diluted chloral hydrate solution and images  
377 were taken with the help of a stereo-zoom microscope (Nikon AZ100, Tokyo, Japan).

### 378 **Gene expression analysis**

379 Expression of all flowering-related genes was checked in the shoot of 12 days old seedlings. RNA  
380 was isolated using Trizol (Sigma) as per the manufacturer's guidelines. RNA was reverse  
381 transcribed using M-MLV RT (Thermo Scientific) and Real-Time Quantitative Reverse  
382 Transcription PCR (qRT PCR) was performed in the "7900HT FAST" real-time PCR system  
383 (Applied Biosystems) using SYBR green based assay. UBIQUITIN5 (UBQ5), and ACTIN7  
384 (ACT7) were used as endogenous controls. The sequences of primers used for qRT-PCR are  
385 provided in **Table S2**.

### 386 **Chromatin immunoprecipitation (ChIP) and qRT PCR**

387 The ChIP was performed as described <sup>58</sup>(). 2g of sample was harvested and fixed in a  
388 formaldehyde-based buffer. Chromatin was sheared to an average length of 500 bp and  
389 immunoprecipitated with specific antibodies, anti-GUS, and IgG. Immunoprecipitated chromatin  
390 was quantified using qRT-PCR and normalized with respect to *ACTIN7*.

### 391 **Detection of LDL1 demethylase activity**

392 LDL1 CDS was cloned in the pGEX-4T1 vector (GST tag). Purified LDL1 protein was incubated  
393 with calf thymus histones (Sigma) at RT for 4h in the presence of 30 % glycerol and 50mM Tris-  
394 HCl (pH 8) at room temperature (RT) for 4 h. Histone demethylase activity of LDL1 was then  
395 evaluated by western blot using H3K4me1, H3K4me2, H3K9me1, and H3K9me2 specific  
396 antibodies (Abcam) as per Abcam manual. We used alkaline phosphatase (Sigma) as a secondary  
397 antibody. Detection was done using 5-Bromo-4-chloro-3-indolyl phosphate/ nitro blue tetrazolium  
398 (BCIP/NBT) solution. BCIP is a substrate of alkaline phosphatase and catalyzed BCIP reacts with  
399 NBT to produce a dark blue insoluble precipitate. To stop the reaction, the blot was washed with  
400 autoclaved water.

### 401 **Yeast two-hybrid (Y2H) analysis**

402 The coding sequence of LDL1, LDL2, FLD, FVE, MAF5, FLC, and SVP was cloned in gateway-  
403 based pGBKT7g and pGADT7g Y2H vectors. Positive clones were transformed in *Saccharomyces*  
404 *cerevisiae* strain Y2H gold cells (Takara biotech) and plated on SD -LEU-TRP (DDO) plates.  
405 Yeast transformation was performed as per the manufacturer's protocol (EZ-Yeast transformation  
406 kit, MP Biomedical, USA). Colonies obtained on DDO plates were streaked on SD-ADE-HIS-  
407 LEU-TRP medium plates containing X- $\alpha$ -gal (QDOX) plates. Plates were incubated at 30 °C for  
408 3-5 days.

### 409 **Luciferase assay**

410 For generating *proFT:LUC*, 1688 bp upstream of the translation start site was amplified and cloned  
411 in pGREENII0800. Coding sequences of MAF5, SVP, and FLC were cloned under CaMV 35S  
412 promoter in pGWB441. Constructs were transformed into *Agrobacterium tumefaciens* (GV3101).  
413 Constructs were coinfiltrated into *Nicotiana benthamiana* with different combinations and  
414 luciferase activity of *proFT:LUC* was detected using its substrate luciferin after 2 days using  
415 chemidoc (BioRad).



416 **Statistical Analysis**

417 Numerical data from all experiments were represented with Microsoft Excel. Student's t-tests were  
418 done using Microsoft Excel and One-way ANOVA and post hoc Tukey's tests were done using  
419 IBM SPSS software. Details of the error bar, replicates, statistical tests applied, and significances  
420 are mentioned in the relevant figure legends.

421 **Accession numbers**

422 LDL1 (AT1G62830), LDL2 (AT3G13682), FLD ( AT3G10390), FVE (AT2G19520), HDA5  
423 (AT5G61060), HDA6 (AT5G63110), FLC (AT5G10140), SVP (AT2G22540), MAF4  
424 (AT5G65070) and MAF5 (AT5G65080)

425 **Acknowledgements**

426 We acknowledge NIPGR for providing internal funding and the Central Instrument Facility of  
427 NIPGR to carry out this work. We acknowledge the DBT-eLibrary Consortium (DeLCON) for  
428 providing access to e-resources. Ma, SC, and SS acknowledge the Council of Industrial and  
429 Scientific Research (CSIR; Govt. of India) for providing fellowships. AKS acknowledges funding  
430 from the Science and Engineering Research Board (SERB), Department of Science and  
431 Technology (DST), Government of India (research grant no. EMR/2016/002438). We thank Prof.  
432 Richard Amasino for *fld-1flc-3* and Dr. Keqiang Wu for *ldl1ldl2* and *ldl1ldl2hda6* seeds.

433 **Author contributions**

434 AKS conceived the original research plan and design, supervised the work, and revised the  
435 manuscript. Ma designed and performed most of the experiments, analyzed data, and wrote the  
436 manuscript. SC and SS made substantial contributions to the experiments and complemented the  
437 writing of the manuscript.

438 **Conflict of interest**

439 All authors have read and approved the manuscript and declare no conflict of interest.

440

441

442

443

444

445

446

447 **Figure legends**

448 **Figure 1. LDL1 promotes flowering by negatively regulating the expression of MAF4 and**  
449 **MAF5.** (A) Relative expression of *FLC*, *MAF4*, and *MAF5* in WT and *ldl1*. (B) Relative  
450 expression of *FLC*, *MAF4*, and *MAF5* in WT, *LDL1 OE#1*, and *LDL1 OE#4*. (C) Flowering  
451 phenotype of *maf4*, and *maf5* with respect to WT plants under long-day conditions. Both *maf4* and  
452 *maf5* mutant plants show earlier flowering than WT plants. (D) Rosette leaf numbers of *maf4*,  
453 *maf5*, and WT plants at bolting (n=15). (E) Days taken to flower by *maf4*, *maf5*, and WT plants  
454 (n=15). Expression of *MAF4* and *MAF5* was checked in the shoots of 14 days old seedlings. Error  
455 bars indicate the standard error ( $\pm$  SE) of three independent experiments. Asterisks indicate  
456 significant differences ( $*p \leq 0.05$ ,  $**p \leq 0.01$ ,  $***p \leq 0.001$ ; unpaired two tailed *t*-test) in (A) &  
457 (B). Scale bar=1cm in (C). Different letters on whiskers of box plots in (D) & (E) indicate  
458 statistically significant differences (one-way ANOVA followed by post-hoc Tukey's test,  $p < 0.05$ ).

459 **Figure 2. LDL1 directly binds to the chromatin of MAF4 and MAF5 to regulate their**  
460 **expression.** (A) Enrichment of LDL1 on the promoter and 1st exon of *MAF4* chromatin. (B)  
461 Enrichment of LDL1 on the promoter and 1st exon of *MAF5* chromatin. (C) Construct map of  
462 *proMAF4/proMAF5:GFP-GUS*. (D & E) Expression of *proMAF4:GFP-GUS* in WT and *ldl1*  
463 background at 7dag. (F & G) Expression of *proMAF5:GFP-GUS* in WT and *ldl1* background at  
464 9dag. Error bars indicate the standard error ( $\pm$  SE) of three independent experiments. Asterisks  
465 indicate significant differences ( $*p \leq 0.05$ ,  $**p \leq 0.01$ ,  $***p \leq 0.001$ ; unpaired two tailed *t*-test).  
466 Scale bar=1mm in (D), (E), (F) & (G).

467 **Figure 3. Mutation in MAF4 and MAF5 rescues the late flowering phenotype of ldl1.** (A)  
468 Flowering phenotype of *ldl1maf4* with respect to *ldl1* and WT plants. (B) Rosette leaf numbers of  
469 *ldl1*, *ldl1maf4* and WT plants at bolting (n=15). (C) Days taken to flower by *ldl1*, *ldl1maf4*, and  
470 WT plants (n=15). (D) Flowering phenotype of *ldl1maf5* with respect to *ldl1* and WT. (E) Rosette  
471 leaf numbers of *ldl1*, *ldl1maf5*, and WT plants at bolting (n=15). (F) Days taken to flower by *ldl1*,  
472 *ldl1maf5*, and WT (n=15). Different letters on whiskers of box plots indicate statistically  
473 significant differences (one-way ANOVA followed by post-hoc Tukey's test,  $p < 0.05$ ). Scale  
474 bar=1cm in (A) and (D).

475 **Figure 4. LDL1 has invitro H3K4me2 and H3K9me2 demethylase activity.** (A) LDL1-GST  
476 after purification and concentration. (B) LDL1 demethylation assay followed by western blot using  
477 H3K4me2 and H3K9me2 specific antibodies. (C) and (D) Quantification of bands obtained by  
478 western blotting by 'imageJ' software. A.U.=arbitrary units.

479 **Figure 5. LDL1, along with LDL2 and HDA6, regulates the expression of MAF4 and MAF5.**  
480 (A) Flowering phenotype of *ldl1ldl2* and *ldl1ldl2hda6* with respect to *ldl1*, *ldl2*, and WT plants.  
481 (B) Rosette leaf numbers of WT, *ldl1*, *ldl2*, *ldl1ldl2*, and *ldl1ldl2hda6* plants at bolting (n=15). (C)  
482 Relative expression of *MAF4* in WT, *ldl1*, *ldl2*, *ldl1ldl2*, and *ldl1ldl2hda6*. (D) Relative expression  
483 of *MAF5* in WT, *ldl1*, *ldl2*, *ldl1ldl2*, and *ldl1ldl2hda6*. Expression of *MAF4* and *MAF5* was  
484 checked in the shoots of 14 days old seedlings. Error bars indicate the standard error ( $\pm$  SE) of  
485 three independent experiments. different letters on whiskers of box plots in (B) and error bars in  
486 (C) & (D) indicate statistically significant differences (one-way ANOVA followed by post-hoc  
487 Tukey's test,  $p < 0.05$ ). Scale bar=1cm in (A).

488 **Figure 6. LDL1 and LDL2 interact with FVE to induce flowering.** (A) LDL1 and LDL2 interact  
489 with FVE in a yeast two-hybrid assay. Co-transformed yeast cells were grown on SD medium  
490 lacking Leu and Trp (SD-LW) and the interaction was detected by the growth of yeast cells on  
491 quadruple dropout medium supplemented with 5-bromo-4-chloro-indolyl-galactopyranoside (SD-  
492 LWHA+X-gal). The blue colour indicates MEL1 protein activity. FLD-BD and FVE-AD were  
493 taken as positive controls and empty vectors BD and AD were taken as negative controls. The  
494 experiment was repeated three times. (B) Map showing the position of two guide RNAs in *FVE*  
495 gene for mutating FVE protein using CRISPR-Cas9. (C) Late flowering phenotype of *fve* with  
496 respect to the WT plant. (D) Late flowering phenotype of *ldl1fve* and *ldl2fve* with respect to *fve*  
497 plant. Scale bar=1cm in (C) and (D).

498 **Figure 7. MAF5 interacts with FLC and SVP and negatively regulates FT expression.** (A)  
499 MAF5 forms dimers with itself and interacts with FLC and SVP in a yeast two-hybrid assay. Co-  
500 transformed yeast cells were grown on SD-LW and the interaction was detected by the growth of  
501 yeast cells on SD-LWHA+X-gal medium. The blue colour indicates MEL1 protein activity. FLC-  
502 BD and SVP-AD were taken as positive controls and empty vectors BD and AD were taken as  
503 negative controls. The experiment was repeated three times. (B, C & D) Luciferase transactivation  
504 assay showing relative activity of *FT* promoter in *Nicotiana benthamiana* leaves co-infiltrated with  
505 different transcription factors. The experiment was repeated three times.

506 **Figure 8. LDL1/LDL2 interact with FVE and promote floral transition mutually by**  
507 **repressing MADS-box transcription factors.** LDL1 and LDL2 interact with FVE and HDA6  
508 and assemble as a part of a corepressor complex on *MAF4*, *MAF5*, and *FLC* chromatin. This  
509 corepressor complex alters the chromatin state of these loci to suppress transcription. *MAF4* and  
510 *MAF5* further interact with other MADS-box transcription factors, like *FLC* and *SVP*. These  
511 combinations of MADS-box proteins bring down the transcriptional output of the *FT* locus, and  
512 thus, affect vegetative to floral transition.

513 **Supplementary Figure 1. *ldl1flc* double mutant flowers earlier than *ldl1* single mutant but later**  
514 **than *flc* single mutant.** (A) Flowering phenotype of *ldl1flc* with respect to *ldl1* and *flc*. (B) Rosette  
515 leaf numbers of *ldl1*, *ldl1flc*, and *flc* plants at bolting (n=15). (C) Days taken to flower by *ldl1*,  
516 *ldl1flc*, and *flc* plants (n=15). Different letters on whiskers of box plots in (B) and (C) indicate  
517 statistically significant differences (one-way ANOVA followed by post-hoc Tukey's test, p < 0.05).  
518 Scale bar=1cm in (A).

519 **Supplementary Figure 2. Development of *LDL1 Oe* construct and transgenic lines.** (A)  
520 Construct map for *LDL1* overexpression. (B) *LDL1Oe#1* and *#4* showed maximum  
521 overexpression, respectively. Error bars indicate the standard deviation ( $\pm$  SD) of three technical  
522 replicates.

523 **Supplementary Figure 3. Translational fusion (*proLDL1:LDL1-GUS*) complements late**  
524 **flowering phenotype of *ldl1*.** (A) *LDL1* expression level in translational fusion line of *LDL1* and  
525 empty vector (EV) control in *ldl1* background. (B) Rosette leaf numbers of *EV(ldl1)* and *proLDL1-*  
526 *GUS(ldl1)* plants at bolting (n=15). The experiment was repeated thrice. Error bars indicate the

527 standard error ( $\pm$  SE) of three independent experiments. Asterisks indicate significant differences  
528 ( $*p \leq 0.05$ ,  $**p \leq 0.01$ ,  $***p \leq 0.001$ ; unpaired two tailed *t*-test). Scale bar=1cm in (C).

529 **Supplementary Figure 4. Tissue specific expression pattern of LDL1.** (A) Construct showing  
530 translational fusion map of *LDL1*. (B) GUS activity was observed in different parts of  
531 *pLDL1:LDL1-GUS (ldl1)* transgenic line. (i) SAM of four days old seedling (arrowhead indicates  
532 SAM) (ii) young leaves, (iii) flowers, (iv) primary root, (v) stage iv LRP, (vi) stage vii LRP, (vii)  
533 LR. Scale bar 2 mm in (i) and (iii) and 50  $\mu$ m in (ii), (iv) – (vii).

534 **Supplementary Figure 5. LDL1 doesn't interacts with LDL2, FLD and HDA5 in Y2H assay.**  
535 Co-transformed yeast cells were grown on SD-LW and the interaction was detected by the growth  
536 of yeast cells on SD-LWHA+X-gal medium and the blue colour indicating MEL1 protein activity.  
537 p53-BD and SV40-AD were taken as positive controls and empty vectors were taken as negative  
538 controls.

539 **Supplementary Figure 6. CRISPR/Cas9 mediated mutagenesis in FVE** (A) Vector map of  
540 CRISPR construct. (B) Sequencing alignment of gRNA target region showing deletion in *FVE* in  
541 the WT, *ldl1* and *ldl2* background.

542 **Supplementary Table 1. Summary of FVE homologs as a part of different chromatin modifying**  
543 **complexes in *Arabidopsis thaliana* (*At*), *Saccharomyces cerevisiae* (*Sc*), *Drosophila melanogaster***  
544 **(*Ds*) and *Homo Sapiens* (*Hs*)**

545 **Supplementary Table 2. List of primers used in the study**

546

547

548

549

550

551

552

553

554

555

556

557

558

559

560

561 **References**

562

- 563 1. Franks, S.J. The unique and multifaceted importance of the timing of flowering. *American*  
564 *journal of botany* **102**, 1401-1402 (2015).
- 565 2. He, Y. & Amasino, R.M. Role of chromatin modification in flowering-time control. *Trends*  
566 *in plant science* **10**, 30-35 (2005).
- 567 3. Srikanth, A. & Schmid, M. Regulation of flowering time: all roads lead to Rome. *Cellular*  
568 *and molecular life sciences* **68**, 2013-2037 (2011).
- 569 4. Zhang, Y., Zhou, Y., Chen, Q., Huang, X. & Tian, C.e.J.C.B.o.B. Molecular basis of  
570 flowering time regulation in Arabidopsis. **49**, 469 (2014).
- 571 5. Michaels, S.D. & Amasino, R.M. FLOWERING LOCUS C encodes a novel MADS  
572 domain protein that acts as a repressor of flowering. *Plant Cell* **11**, 949-956 (1999).
- 573 6. Sheldon, C.C. et al. The FLF MADS box gene: a repressor of flowering in Arabidopsis  
574 regulated by vernalization and methylation. *Plant Cell* **11**, 445-458 (1999).
- 575 7. Helliwell, C.A., Wood, C.C., Robertson, M., James Peacock, W. & Dennis, E.S. The  
576 Arabidopsis FLC protein interacts directly in vivo with SOC1 and FT chromatin and is part  
577 of a high-molecular-weight protein complex. *The Plant Journal* **46**, 183-192 (2006).
- 578 8. Searle, I. et al. The transcription factor FLC confers a flowering response to vernalization  
579 by repressing meristem competence and systemic signaling in Arabidopsis. *Genes Dev* **20**,  
580 898-912 (2006).
- 581 9. Li, D. et al. A repressor complex governs the integration of flowering signals in  
582 Arabidopsis. *Dev Cell* **15**, 110-120 (2008).
- 583 10. Ratcliffe, O.J., Nadzan, G.C., Reuber, T.L. & Riechmann, J.L. Regulation of flowering in  
584 Arabidopsis by an FLC homologue. *Plant Physiol* **126**, 122-132 (2001).
- 585 11. Scortecci, K., Michaels, S.D. & Amasino, R.M. Genetic interactions between FLM and  
586 other flowering-time genes in Arabidopsis thaliana. *Plant Molecular Biology* **52**, 915-922  
587 (2003).
- 588 12. Lee, J.H. et al. Regulation of temperature-responsive flowering by MADS-box  
589 transcription factor repressors. *Science* **342**, 628-632 (2013).
- 590 13. Ratcliffe, O.J., Kumimoto, R.W., Wong, B.J. & Riechmann, J.L. Analysis of the  
591 Arabidopsis MADS AFFECTING FLOWERING gene family: MAF2 prevents  
592 vernalization by short periods of cold. *The Plant cell* **15**, 1159-1169 (2003).
- 593 14. Gu, X., Jiang, D., Wang, Y., Bachmair, A. & He, Y. Repression of the floral transition via  
594 histone H2B monoubiquitination. *The Plant journal : for cell and molecular biology* **57**,  
595 522-533 (2009).
- 596 15. Gu, X. et al. Arabidopsis FLC clade members form flowering-repressor complexes  
597 coordinating responses to endogenous and environmental cues. *Nature Communications* **4**,  
598 1947 (2013).
- 599 16. de Folter, S. et al. Comprehensive interaction map of the Arabidopsis MADS Box  
600 transcription factors. *Plant Cell* **17**, 1424-1433 (2005).
- 601 17. Riechmann, J.L., Krizek, B.A. & Meyerowitz, E.M. Dimerization specificity of  
602 Arabidopsis MADS domain homeotic proteins APETALA1, APETALA3, PISTILLATA,  
603 and AGAMOUS. *Proceedings of the National Academy of Sciences of the United States of*  
604 *America* **93**, 4793-4798 (1996).



- 605 18. Hepworth, S.R., Valverde, F., Ravenscroft, D., Mouradov, A. & Coupland, G. Antagonistic  
606 regulation of flowering-time gene SOC1 by CONSTANS and FLC via separate promoter  
607 motifs. *Embo j* **21**, 4327-4337 (2002).
- 608 19. Lee, J.H. et al. Role of SVP in the control of flowering time by ambient temperature in  
609 Arabidopsis. *Genes Dev* **21**, 397-402 (2007).
- 610 20. Whittaker, C. & Dean, C. The FLC Locus: A Platform for Discoveries in Epigenetics and  
611 Adaptation. **33**, 555-575 (2017).
- 612 21. Cheng, J.Z., Zhou, Y.P., Lv, T.X., Xie, C.P. & Tian, C.E. Research progress on the  
613 autonomous flowering time pathway in Arabidopsis. *Physiol Mol Biol Plants* **23**, 477-485  
614 (2017).
- 615 22. He, Y., Michaels, S.D. & Amasino, R.M. Regulation of Flowering Time by Histone  
616 Acetylation in Arabidopsis. *Science* **302**, 1751-1754 (2003).
- 617 23. Domagalska, M.A. et al. Attenuation of brassinosteroid signaling enhances  
618 FLC expression and delays flowering. *Development* **134**, 2841-2850 (2007).
- 619 24. Yu, C.-W. et al. HISTONE DEACETYLASE6 Interacts with FLOWERING LOCUS D  
620 and Regulates Flowering in Arabidopsis. *Plant Physiology* **156**, 173-184 (2011).
- 621 25. Luo, M. et al. Regulation of flowering time by the histone deacetylase HDA 5 in A  
622 rabidopsis. *The Plant Journal* **82**, 925-936 (2015).
- 623 26. Gu, X. et al. Arabidopsis homologs of retinoblastoma-associated protein 46/48 associate  
624 with a histone deacetylase to act redundantly in chromatin silencing. *PLoS Genet* **7**,  
625 e1002366 (2011).
- 626 27. Jiang, D., Yang, W., He, Y. & Amasino, R.M. Arabidopsis relatives of the human lysine-  
627 specific Demethylase1 repress the expression of FWA and FLOWERING LOCUS C and  
628 thus promote the floral transition. *The Plant Cell* **19**, 2975-2987 (2007).
- 629 28. Stavropoulos, P., Blobel, G. & Hoelz, A. Crystal structure and mechanism of human lysine-  
630 specific demethylase-1. *Nature structural & molecular biology* **13**, 626-632 (2006).
- 631 29. Yang, M. et al. Structural basis for CoREST-dependent demethylation of nucleosomes by  
632 the human LSD1 histone demethylase. *Molecular cell* **23**, 377-387 (2006).
- 633 30. Binda, C., Mattevi, A. & Edmondson, D.E. Structure-function relationships in  
634 flavoenzyme-dependent amine oxidations a comparison of polyamine oxidase and  
635 monoamine oxidase. *Journal of biological chemistry* **277**, 23973-23976 (2002).
- 636 31. Binda, C., Newton-Vinson, P., Hubálek, F., Edmondson, D.E. & Mattevi, A. Structure of  
637 human monoamine oxidase B, a drug target for the treatment of neurological disorders.  
638 *Nature structural biology* **9**, 22-26 (2002).
- 639 32. Zhao, M., Yang, S., Liu, X. & Wu, K. Arabidopsis histone demethylases LDL1 and LDL2  
640 control primary seed dormancy by regulating DELAY OF GERMINATION 1 and ABA  
641 signaling-related genes. *Frontiers in plant science* **6**, 159 (2015).
- 642 33. Hung, F.-Y. et al. The Arabidopsis LDL1/2-HDA6 histone modification complex is  
643 functionally associated with CCA1/LHY in regulation of circadian clock genes. *Nucleic  
644 acids research* **46**, 10669-10681 (2018).
- 645 34. Krichevsky, A., Zaltsman, A., Kozlovsky, S.V., Tian, G.-W. & Citovsky, V. Regulation of  
646 root elongation by histone acetylation in Arabidopsis. *Journal of molecular biology* **385**,  
647 45-50 (2009).
- 648 35. Singh, S., Singh, A., Roy, S. & Sarkar, A.K. SWP1 negatively regulates lateral root  
649 initiation and elongation in Arabidopsis. *Plant signaling & behavior* **7**, 1522-1525 (2012).



- 650 36. Krichevsky, A. et al. C2H2 zinc finger-SET histone methyltransferase is a plant-specific  
651 chromatin modifier. *Developmental biology* **303**, 259-269 (2007).
- 652 37. Maruyama, D. et al. Independent control by each female gamete prevents the attraction of  
653 multiple pollen tubes. *Dev Cell* **25**, 317-323 (2013).
- 654 38. Maiques-Diaz, A. & Somerville, T.C.J.E. LSD1: biologic roles and therapeutic targeting.  
655 **8**, 1103-1116 (2016).
- 656 39. Shi, Y. et al. Histone demethylation mediated by the nuclear amine oxidase homolog  
657 LSD1. *Cell* **119**, 941-953 (2004).
- 658 40. Metzger, E. et al. LSD1 demethylates repressive histone marks to promote androgen-  
659 receptor-dependent transcription. *Nature* **437**, 436-439 (2005).
- 660 41. Carnesecchi, J. et al. ERR $\alpha$  induces H3K9 demethylation by LSD1 to promote cell  
661 invasion. *Proceedings of the National Academy of Sciences of the United States of America*  
662 **114**, 3909-3914 (2017).
- 663 42. Kim, D.-H. & Sung, S. Coordination of the Vernalization Response through a  
664 <em>VIN3</em> and <em>FLC</em> Gene Family Regulatory Network in  
665 <em>Arabidopsis</em>. *The Plant Cell* **25**, 454-469 (2013).
- 666 43. Kong, X. et al. Expression of FRIGIDA in root inhibits flowering in *Arabidopsis thaliana*.  
667 *Journal of Experimental Botany* **70**, 5101-5114 (2019).
- 668 44. Hung, F.-Y. et al. The expression of long non-coding RNAs is associated with H3Ac and  
669 H3K4me2 changes regulated by the HDA6-LDL1/2 histone modification complex in  
670 *Arabidopsis*. *NAR Genomics and Bioinformatics* **2** (2020).
- 671 45. Keren, I., Lapidot, M. & Citovsky, V. Coordinate activation of a target gene by KDM1C  
672 histone demethylase and OTLD1 histone deubiquitinase in *Arabidopsis*. *Epigenetics* **14**,  
673 602-610 (2019).
- 674 46. Hung, F.-Y. et al. The LDL1/2-HDA6 histone modification complex interacts with TOC1  
675 and regulates the core circadian clock components in *Arabidopsis*. *Frontiers in plant*  
676 *science* **10**, 233 (2019).
- 677 47. Koornneef, M., Hanhart, C. & Van der Veen, J. A genetic and physiological analysis of  
678 late flowering mutants in *Arabidopsis thaliana*. *Molecular and General Genetics MGG*  
679 **229**, 57-66 (1991).
- 680 48. Kenzior, A.L. & Folk, W.R. AtMSI4 and RbAp48 WD-40 repeat proteins bind metal ions.  
681 *FEBS letters* **440**, 425-429 (1998).
- 682 49. Kim, D.H. & Sung, S. Coordination of the vernalization response through a VIN3 and FLC  
683 gene family regulatory network in *Arabidopsis*. *Plant Cell* **25**, 454-469 (2013).
- 684 50. Zhao, X. et al. Global identification of *Arabidopsis* lncRNAs reveals the regulation of  
685 MAF4 by a natural antisense RNA. *Nat Commun* **9**, 5056 (2018).
- 686 51. Heo, J.B. & Sung, S. Vernalization-mediated epigenetic silencing by a long intronic  
687 noncoding RNA. *Science* **331**, 76-79 (2011).
- 688 52. Kim, D.H. & Sung, S. Vernalization-Triggered Intragenic Chromatin Loop Formation by  
689 Long Noncoding RNAs. *Dev Cell* **40**, 302-312.e304 (2017).
- 690 53. Helliwell, C.A., Robertson, M., Finnegan, E.J., Buzas, D.M. & Dennis, E.S. Vernalization-  
691 repression of *Arabidopsis* FLC requires promoter sequences but not antisense transcripts.  
692 *PloS one* **6**, e21513-e21513 (2011).
- 693 54. Smaczniak, C. et al. Characterization of MADS-domain transcription factor complexes in  
694 *Arabidopsis* flower development. *Proceedings of the National Academy of Sciences of the*  
695 *United States of America* **109**, 1560-1565 (2012).

- 696 55. Classic Murashige, T. & Skoog, F. A revised medium for rapid growth and bioassays with  
697 tobacco tissue cultures. *Physiologia Plantarum* **15**, 473-497 (1962).
- 698 56. Clough, S.J. & Bent, A.F. Floral dip: a simplified method for *Agrobacterium*-mediated  
699 transformation of *Arabidopsis thaliana*. *The Plant journal : for cell and molecular biology*  
700 **16**, 735-743 (1998).
- 701 57. Jefferson, R.A., Kavanagh, T.A. & Bevan, M.W. GUS fusions: beta-glucuronidase as a  
702 sensitive and versatile gene fusion marker in higher plants. *The EMBO journal* **6**, 3901-  
703 3907 (1987).
- 704 58. Saleh, A., Alvarez-Venegas, R. & Avramova, Z. An efficient chromatin  
705 immunoprecipitation (ChIP) protocol for studying histone modifications in *Arabidopsis*  
706 plants. *Nature Protocols* **3**, 1018-1025 (2008).
- 707 59. Kaya, H. et al. FASCIATA genes for chromatin assembly factor-1 in *Arabidopsis* maintain  
708 the cellular organization of apical meristems. *Cell* **104**, 131-142 (2001).
- 709 60. Derkacheva, M. et al. *Arabidopsis* MSI1 connects LHP1 to PRC2 complexes. *Embo j* **32**,  
710 2073-2085 (2013).
- 711 61. Xu, Y. et al. MSI1 and HDA6 function interdependently to control flowering time via  
712 chromatin modifications. **109**, 831-843 (2022).
- 713 62. Tan, L.-M. et al. Dual Recognition of H3K4me3 and DNA by the ISWI Component ARID5  
714 Regulates the Floral Transition in *Arabidopsis*. *The Plant Cell* **32**, 2178-2195 (2020).
- 715 63. Doyle, M.R. & Amasino, R.M. A Single Amino Acid Change in the Enhancer of Zeste  
716 Ortholog CURLY LEAF Results in Vernalization-Independent, Rapid Flowering in  
717 *Arabidopsis*. *Plant Physiology* **151**, 1688-1697 (2009).
- 718 64. Yu, C.-W., Chang, K.-Y. & Wu, K. Genome-wide analysis of gene regulatory networks of  
719 the FVE-HDA6-FLD complex in *Arabidopsis*. *Frontiers in plant science* **7**, 555 (2016).
- 720 65. Kaufman, P.D., Kobayashi, R. & Stillman, B. Ultraviolet radiation sensitivity and  
721 reduction of telomeric silencing in *Saccharomyces cerevisiae* cells lacking chromatin  
722 assembly factor-I. *Genes Dev* **11**, 345-357 (1997).
- 723 66. Ge, Z., Wang, H. & Parthun, M.R. Nuclear Hat1p complex (NuB4) components participate  
724 in DNA repair-linked chromatin reassembly. *The Journal of biological chemistry* **286**,  
725 16790-16799 (2011).
- 726 67. Tie, F., Furuyama, T., Prasad-Sinha, J., Jane, E. & Harte, P.J. The *Drosophila* Polycomb  
727 Group proteins ESC and E(Z) are present in a complex containing the histone-binding  
728 protein p55 and the histone deacetylase RPD3. *Development* **128**, 275-286 (2001).
- 729 68. Suganuma, T., Pattenden, S.G. & Workman, J.L. Diverse functions of WD40 repeat  
730 proteins in histone recognition. *Genes Dev* **22**, 1265-1268 (2008).
- 731 69. Hassig, C.A., Fleischer, T.C., Billin, A.N., Schreiber, S.L. & Ayer, D.E. Histone  
732 deacetylase activity is required for full transcriptional repression by mSin3A. *Cell* **89**, 341-  
733 347 (1997).
- 734 70. Sugimoto, N. et al. Cdt1-binding protein GRWD1 is a novel histone-binding protein that  
735 facilitates MCM loading through its influence on chromatin architecture. *Nucleic Acids Res*  
736 **43**, 5898-5911 (2015).
- 737 71. Xue, Y. et al. NURD, a novel complex with both ATP-dependent chromatin-remodeling  
738 and histone deacetylase activities. *Mol Cell* **2**, 851-861 (1998).
- 739 72. Kuzmichev, A., Nishioka, K., Erdjument-Bromage, H., Tempst, P. & Reinberg, D. Histone  
740 methyltransferase activity associated with a human multiprotein complex containing the  
741 Enhancer of Zeste protein. *Genes Dev* **16**, 2893-2905 (2002).

- 742 73. Murzina, N.V. et al. Structural basis for the recognition of histone H4 by the histone-  
743 chaperone RbAp46. *Structure (London, England : 1993)* **16**, 1077-1085 (2008).  
744 74. Verreault, A., Kaufman, P.D., Kobayashi, R. & Stillman, B. Nucleosome assembly by a  
745 complex of CAF-1 and acetylated histones H3/H4. *Cell* **87**, 95-104 (1996).

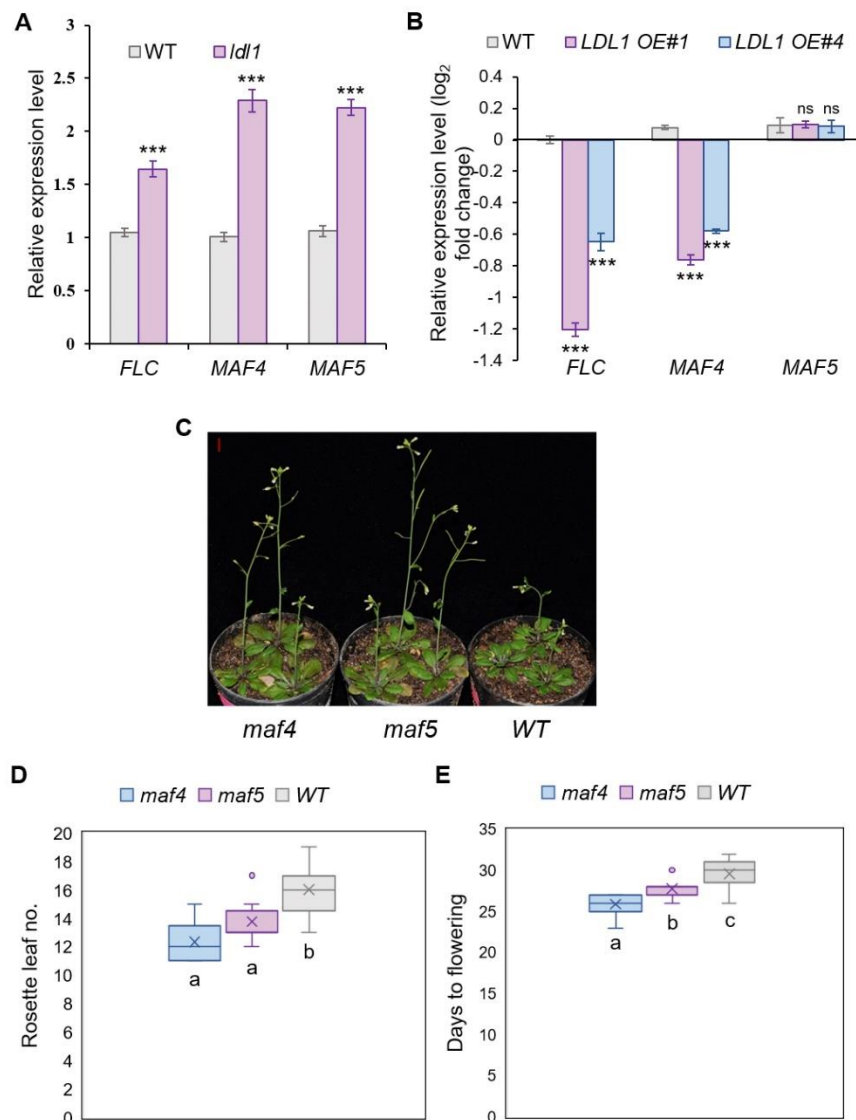

**Figure 1. *LDL1* promotes flowering by negatively regulating the expression of *MAF4* and *MAF5*.** (A) Relative expression of *FLC*, *MAF4*, and *MAF5* in WT and *ldl1*. (B) Relative expression of *FLC*, *MAF4*, and *MAF5* in WT, *LDL1 OE#1*, and *LDL1 OE#4*. (C) Flowering phenotype of *maf4*, and *maf5* with respect to WT plants under long-day conditions. Both *maf4* and *maf5* mutant plants show earlier flowering than WT plants. (D) Rosette leaf numbers of *maf4*, *maf5*, and WT plants at bolting (n=15). (E) Days taken to flower by *maf4*, *maf5*, and WT plants (n=15). Expression of *MAF4* and *MAF5* was checked in the shoots of 14 days old seedlings. Error bars indicate the standard error ( $\pm$  SE) of three independent experiments. Asterisks indicate significant differences ( $*p \leq 0.05$ ,  $**p \leq 0.01$ ,  $***p \leq 0.001$ ; unpaired two tailed *t*-test) in (A) & (B). Scale bar=1cm in (C). Different letters on whiskers of box plots in (D) & (E) indicate statistically significant differences (one-way ANOVA followed by post-hoc Tukey's test,  $p < 0.05$ ).

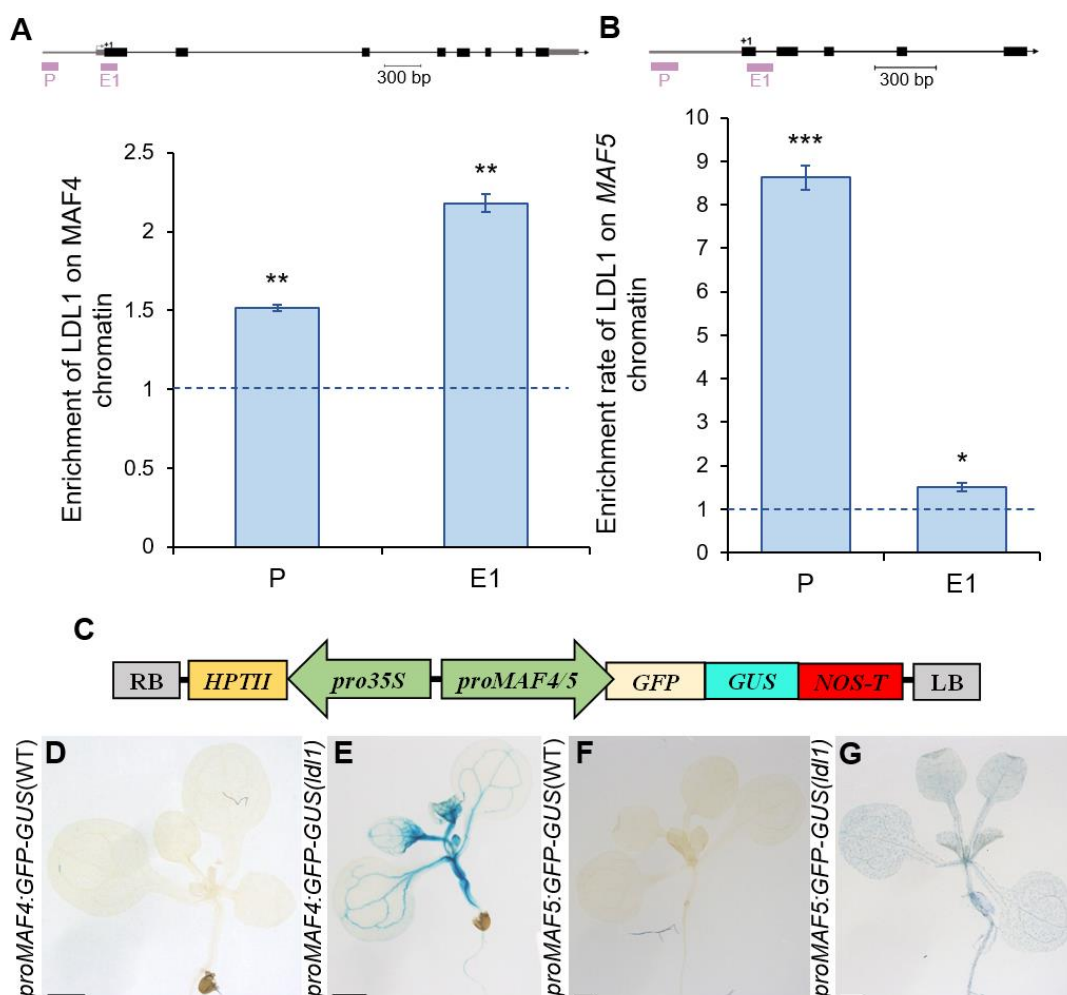

Figure 2. LDL1 directly binds to the chromatin of *MAF4* and *MAF5* to regulate their expression. (A) Enrichment of LDL1 on the promoter and 1st exon of *MAF4* chromatin. (B) Enrichment of LDL1 on the promoter and 1st exon of *MAF5* chromatin. (C) Construct map of *proMAF4/proMAF5:GFP-GUS*. (D & E) Expression of *proMAF4:GFP-GUS* in WT and *ldl1* background at 7dag. (F & G) Expression of *proMAF5:GFP-GUS* in WT and *ldl1* background at 9dag. Error bars indicate the standard error ( $\pm$  SE) of three independent experiments. Asterisks indicate significant differences ( $*p \leq 0.05$ ,  $**p \leq 0.01$ ,  $***p \leq 0.001$ ; unpaired two tailed *t*-test). Scale bar=1mm in (D), (E), (F) & (G).

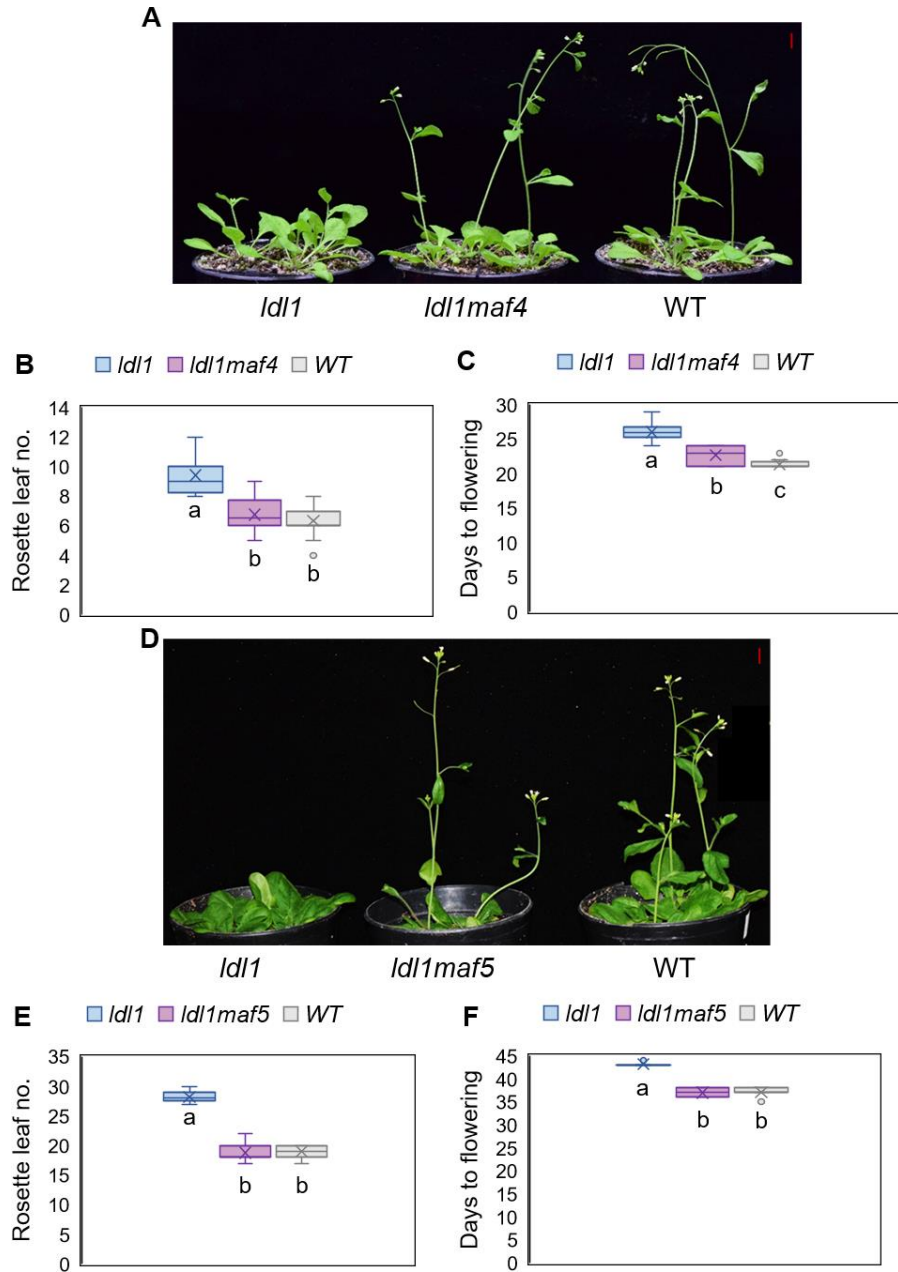

**Figure 3. Mutation in MAF4 and MAF5 rescues the late flowering phenotype of *ldl1*.** (A) Flowering phenotype of *ldl1maf4* with respect to *ldl1* and WT plants. (B) Rosette leaf numbers of *ldl1*, *ldl1maf4* and WT plants at bolting (n=15). (C) Days taken to flower by *ldl1*, *ldl1maf4*, and WT plants (n=15). (D) Flowering phenotype of *ldl1maf5* with respect to *ldl1* and WT. (E) Rosette leaf numbers of *ldl1*, *ldl1maf5*, and WT plants at bolting (n=15). (F) Days taken to flower by *ldl1*, *ldl1maf5*, and WT (n=15). Different letters on whiskers of box plots indicate statistically significant differences (one-way ANOVA followed by post-hoc Tukey's test,  $p < 0.05$ ). Scale bar=1cm in (A) and (D).



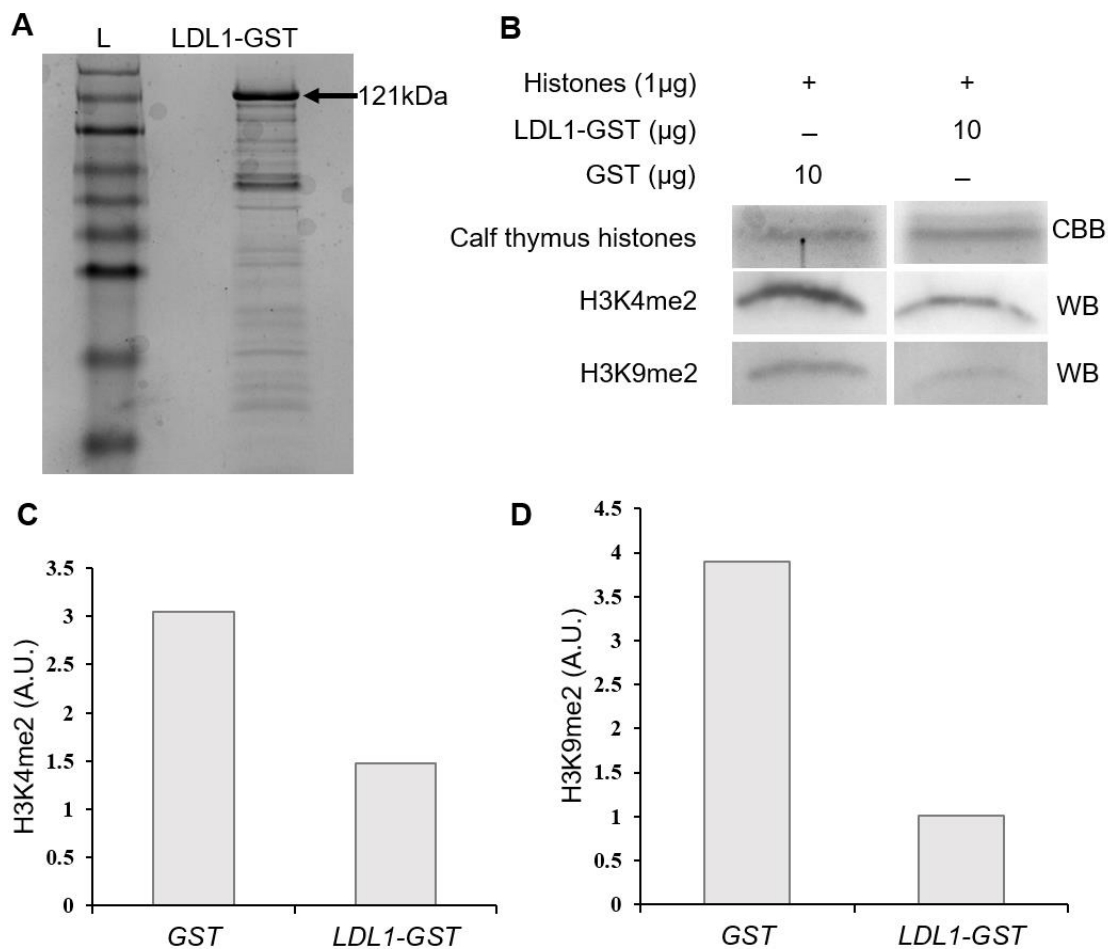

Figure 4. **LDL1 has invitro H3K4me2 and H3K9me2 demethylase activity.** (A) LDL1-GST after purification and concentration. (B) LDL1 demethylation assay followed by western blot using H3K4me2 and H3K9me2 specific antibodies. (C) and (D) Quantification of bands obtained by western blotting by 'imageJ' software. A.U.=arbitrary units.

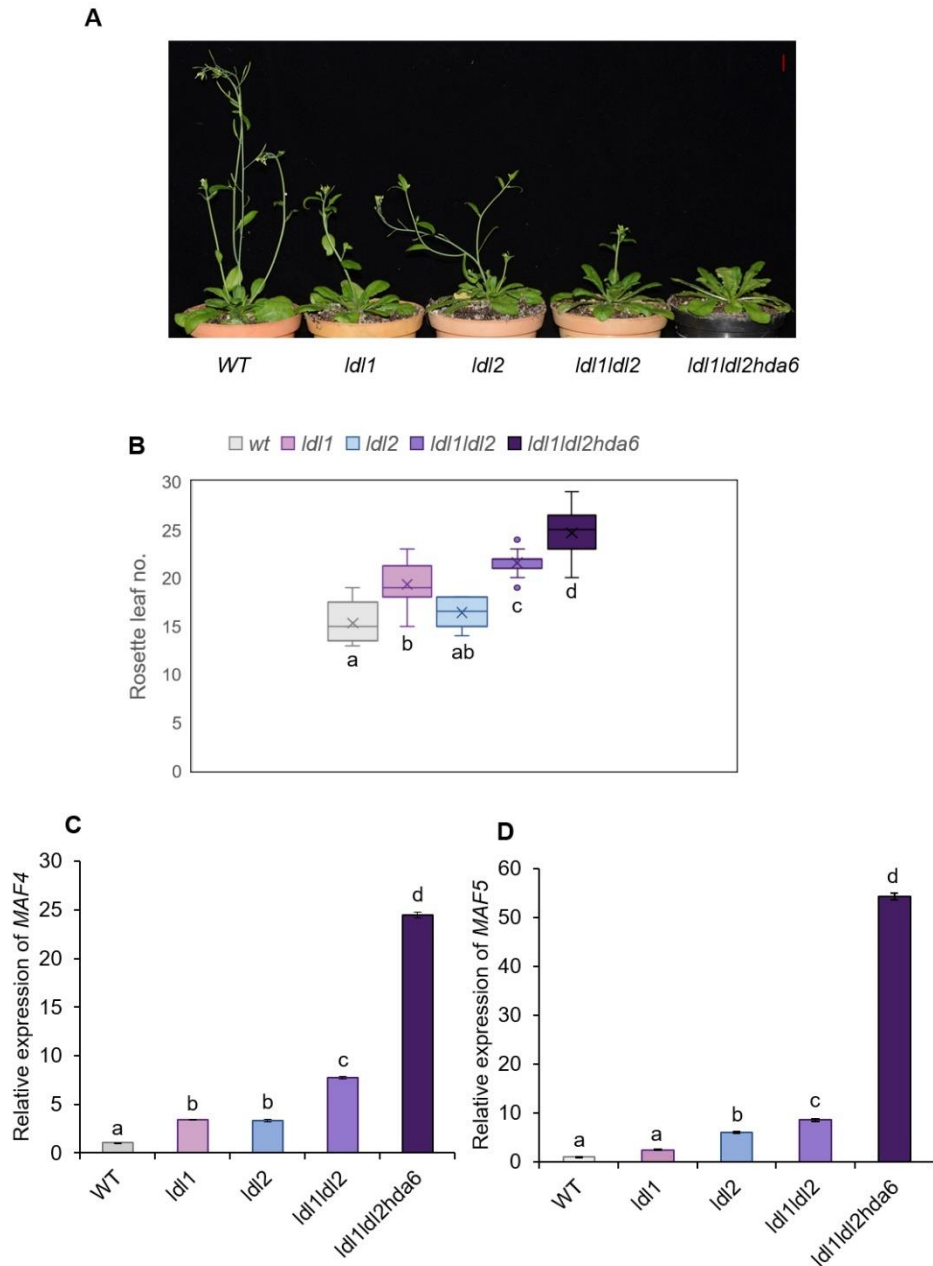

**Figure 5. LDL1, along with LDL2 and HDA6, regulates the expression of MAF4 and MAF5.** (A) Flowering phenotype of *ldl1ldl2* and *ldl1ldl2hda6* with respect to *ldl1*, *ldl2*, and WT plants. (B) Rosette leaf numbers of WT, *ldl1*, *ldl2*, *ldl1ldl2*, and *ldl1ldl2hda6* plants at bolting (n=15). (C) Relative expression of *MAF4* in WT, *ldl1*, *ldl2*, *ldl1ldl2*, and *ldl1ldl2hda6*. (D) Relative expression of *MAF5* in WT, *ldl1*, *ldl2*, *ldl1ldl2*, and *ldl1ldl2hda6*. Expression of *MAF4* and *MAF5* was checked in the shoots of 14 days old seedlings. Error bars indicate the standard error ( $\pm$  SE) of three independent experiments. Different letters on whiskers of box plots in (B) and error bars in (C) & (D) indicate statistically significant differences (one-way ANOVA followed by post-hoc Tukey's test,  $p < 0.05$ ). Scale bar=1cm in (A).

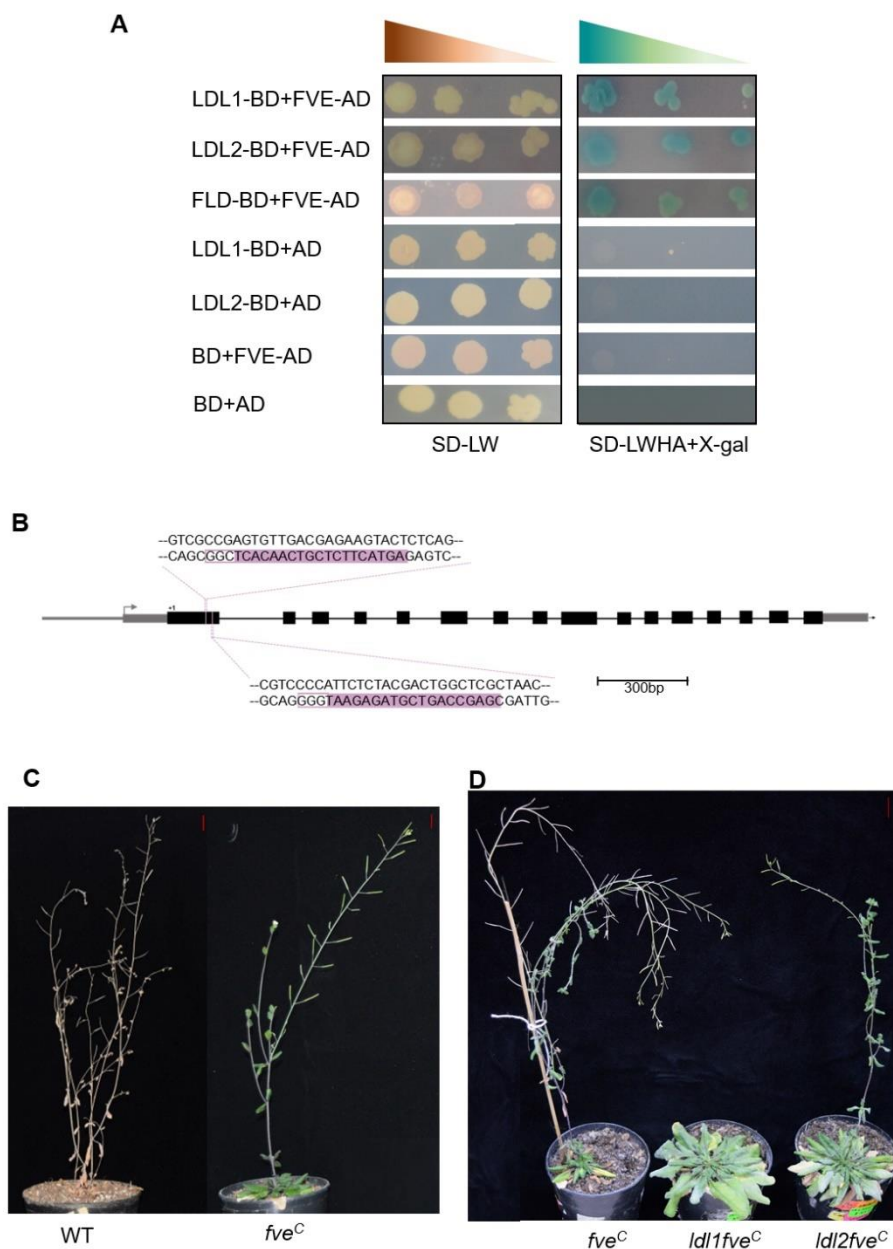

**Figure 6. LDL1 and LDL2 interact with FVE to induce flowering.** (A) LDL1 and LDL2 interact with FVE in a yeast two-hybrid assay. Co-transformed yeast cells were grown on SD medium lacking Leu and Trp (SD-LW) and the interaction was detected by the growth of yeast cells on quadruple dropout medium supplemented with 5-bromo-4-chloro-indolyl-galactopyranoside (SD-LWHA+X-gal). The blue colour indicates MEL1 protein activity. FLD-BD and FVE-AD were taken as positive controls and empty vectors BD and AD were taken as negative controls. The experiment was repeated three times. (B) Map showing the position of two guide RNAs in *FVE* gene for mutating FVE protein using CRISPR-Cas9. (C) Late flowering phenotype of *fve* with respect to the WT plant. (D) Late flowering phenotype of *ldl1fve* and *ldl2fve* with respect to *fve* plant. Scale bar=1cm in (C) and (D).

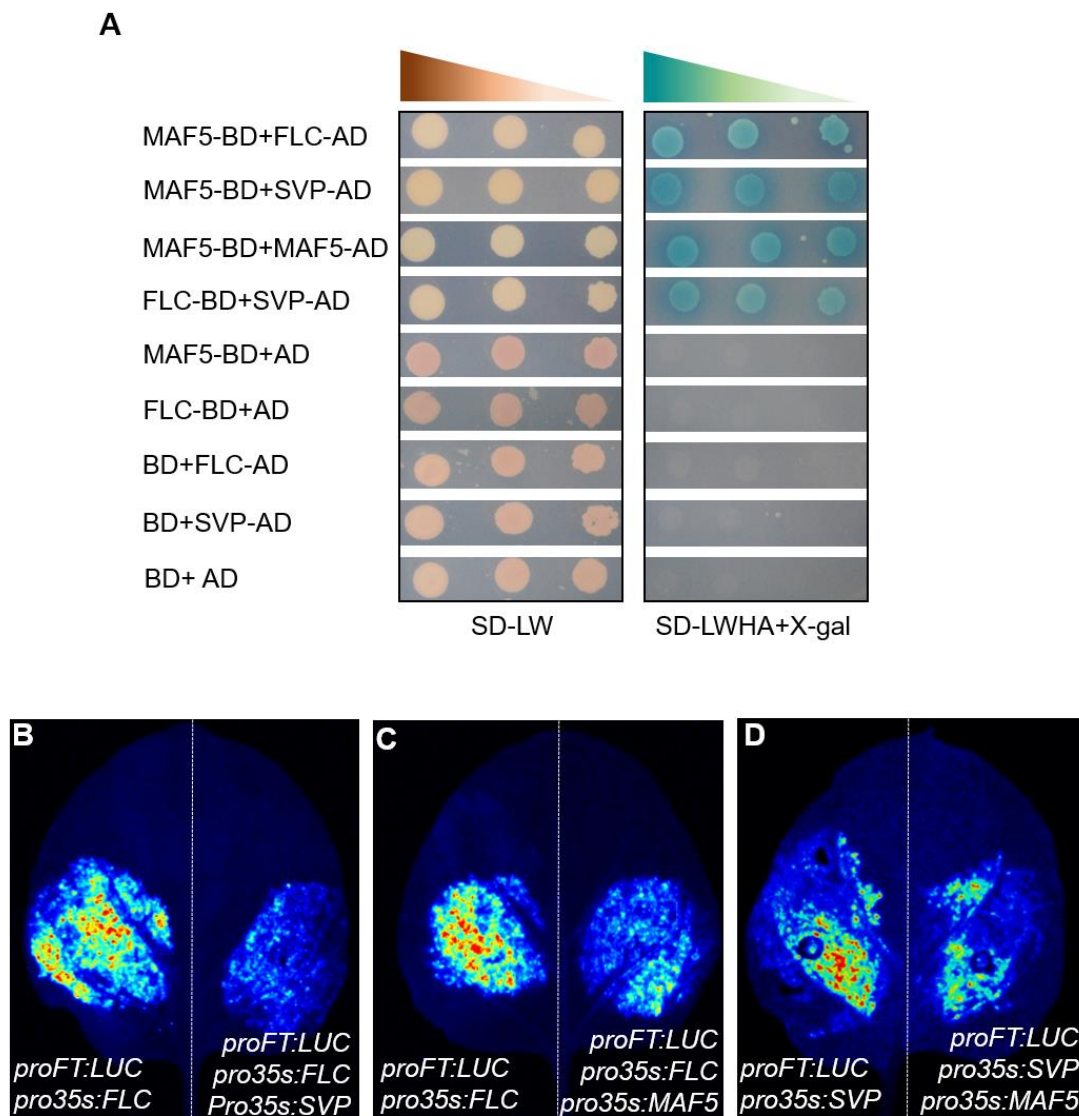

Figure 7. **MAF5 interacts with FLC and SVP and negatively regulates *FT* expression.** (A) MAF5 forms dimers with itself and interacts with FLC and SVP in a yeast two-hybrid assay. Co-transformed yeast cells were grown on SD-LW and the interaction was detected by the growth of yeast cells on SD-LWHA+X-gal medium. The blue colour indicates MEL1 protein activity. FLC-BD and SVP-AD were taken as positive controls and empty vectors BD and AD were taken as negative controls. The experiment was repeated three times. (B, C & D) Luciferase transactivation assay showing relative activity of *FT* promoter in *Nicotiana benthamiana* leaves co-infiltrated with different transcription factors. The experiment was repeated three times.

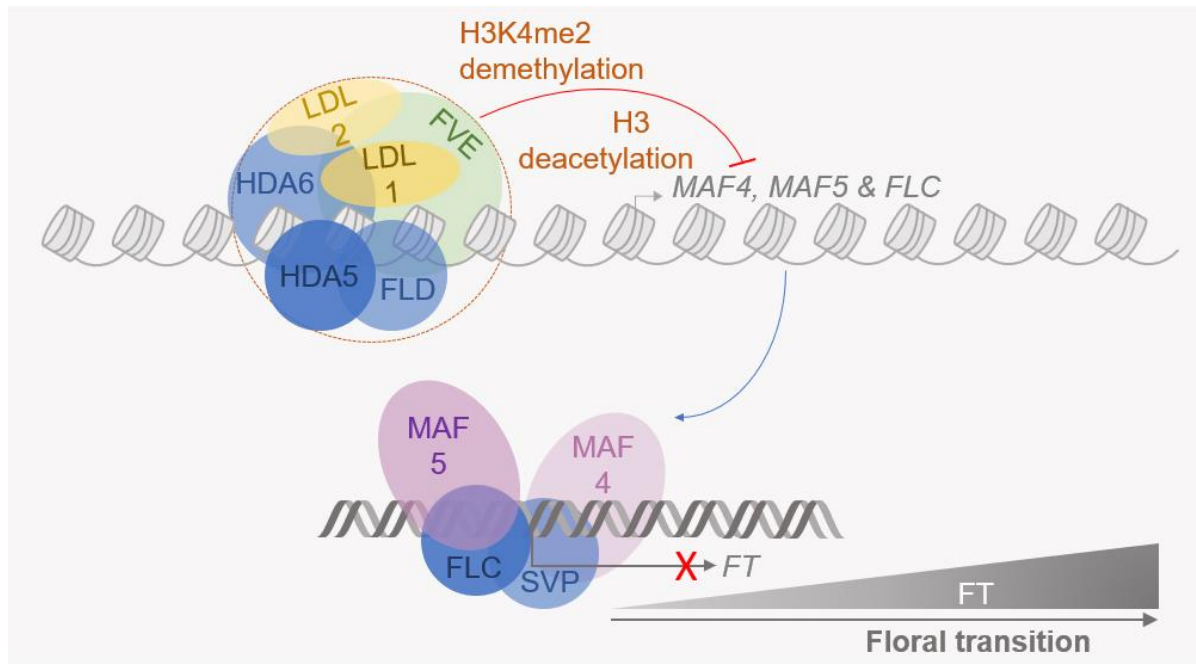

Figure 8. **LDL1/LDL2 interact with FVE and promote floral transition mutually by repressing MADS-box transcription factors.** LDL1 and LDL2 interact with FVE and HDA6 and assemble as a part of a corepressor complex on *MAF4*, *MAF5*, and *FLC* chromatin. This corepressor complex alters the chromatin state of these loci to suppress transcription. *MAF4* and *MAF5* further interact with other MADS-box transcription factors, like *FLC* and *SVP*. These combinations of MADS-box proteins bring down the transcriptional output of the *FT* locus, and thus, affect vegetative to floral transition.
